# Supplementary material
Source: PubMed Central journal article supplement (PMC2766656)
Supplement: tjp0587-4543-SD1.pdf [file tjp0587-4543-SD1.pdf]

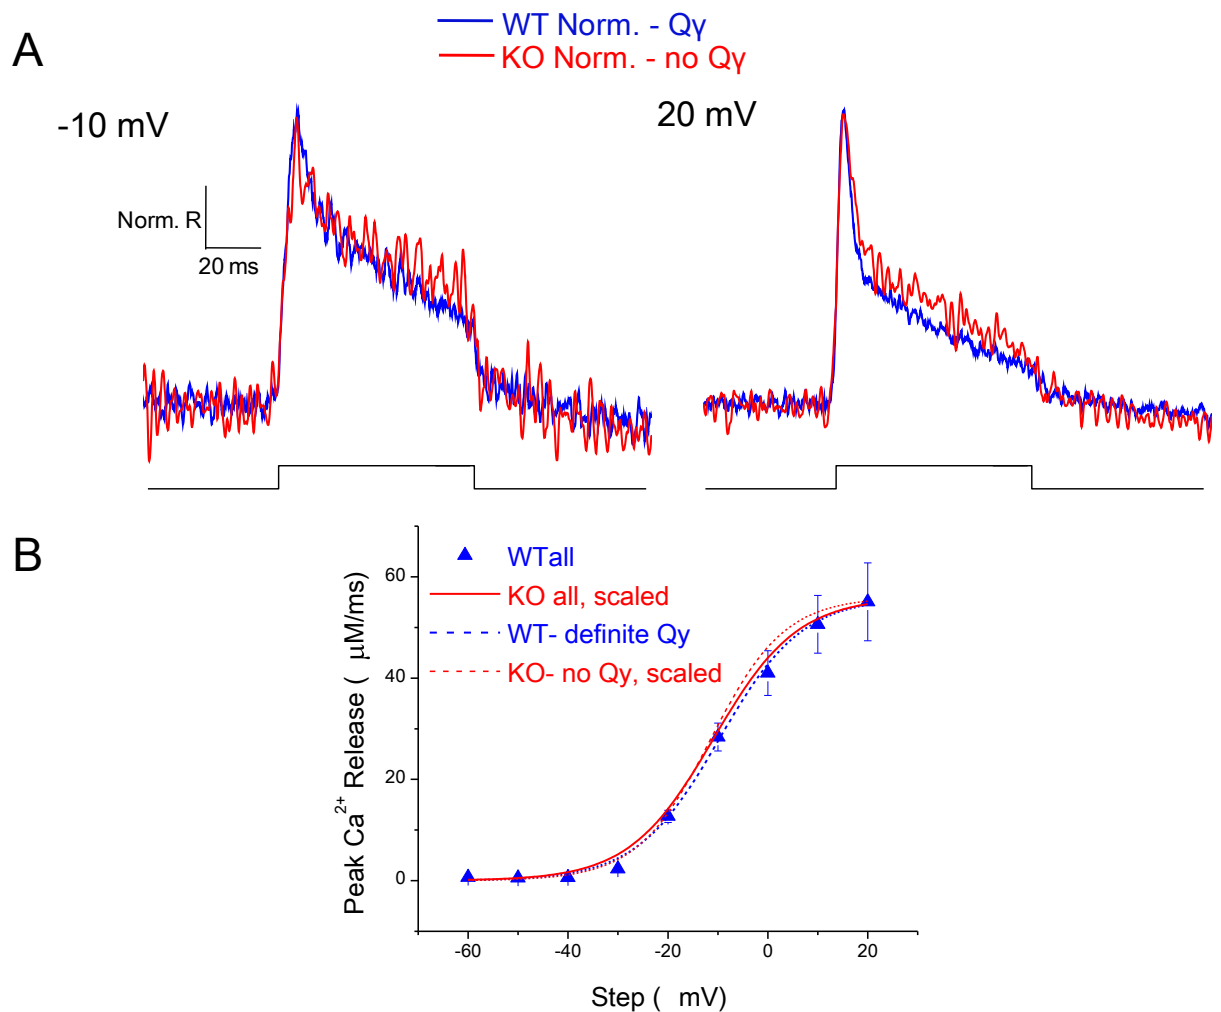

**FOR PUBLICATION: Supplemental Figure 1: A**, Normalized time course of  $Ca^{2+}$  release flux in 7 WT fibres demonstrating definite  $Q\gamma$ , and 7 KO fibres demonstrating no  $Q\gamma$ . **B**, Voltage dependence of peak  $Ca^{2+}$  release rate of all pooled WT and KO fibres (scaled to WT peak) as seen in Fig. 4C, now plotted with the voltage dependence of release in only WT fibres demonstrating definite  $Q\gamma$ , and only KO fibres lacking  $Q\gamma$  (scaled to WT peak). Despite the relatively large, delayed additional charge moved in these WT compared to KO fibres (see Fig. 7), there were no detectable differences in the relative time course or voltage dependence of release flux between these groups at any voltages tested. These findings are consistent with  $Q\gamma$  occurring as a consequence of  $Ca^{2+}$  release.
